# Supplementary material for: No-Scar Transoral Thyroglossal Duct Cyst Excision in Children
Source: PubMed Central journal article supplement — Thyroid. 2018 Jun 1;28(6):755–61. doi: 10.1089/thy.2017.0529 (PMC5994682; doi:10.1089/thy.2017.0529), 2018-06-01
Supplement: Supp_Figure1.pdf [file Supp_Figure1.pdf]

## Supplementary Data

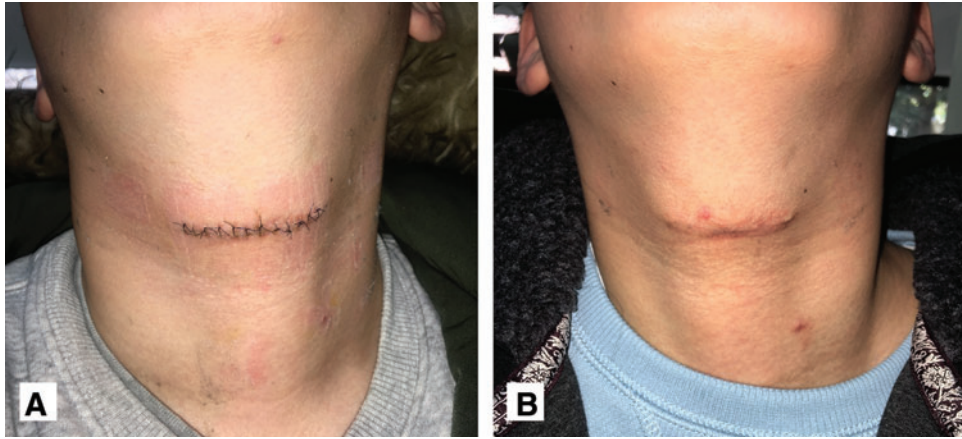

**SUPPLEMENTARY FIG. S1.** (A, B) Following the conventional operation, a persistent scar is present.
